# Supplementary material
Source: PubMed Central journal article supplement (PMC9265526)
Supplement: sj-pdf-1-ebm-10.1177_15353702221082613.pdf [file sj-pdf-1-ebm-10.1177_15353702221082613.pdf]

Table S1 List of 257 up-regulated proteins

| gene  | Uniprot IDs | Description                                             | Mean_Ratio<br>treated-VS-control | Qvalue<br>treated-VS-control |
|-------|-------------|---------------------------------------------------------|----------------------------------|------------------------------|
| IF4A2 | Q14240      | Eukaryotic initiation factor 4A-II                      | 1.37                             | 0.008 0.922                  |
| PAK2  | Q13177      | Serine/threonine-protein kinase PAK 2                   | 1.01                             | 0.188 0.008                  |
| HUWE1 | Q7Z6Z7      | E3 ubiquitin-protein ligase HUWE1                       | 1.15                             | 0.003 0.999                  |
| L2HDH | Q9H9P8      | L-2-hydroxyglutarate dehydrogenase, mitochondrial       | 1.1                              | 0.126 0.010                  |
| MYH9  | P35579      | Myosin-9                                                | 1.08                             | 0.002 0.048                  |
| ALBU  | P02768      | Serum albumin                                           | 1.05                             | 0.002 0.002                  |
| F10A1 | P50502      | Hsc70-interacting protein                               | 1.12                             | 0.003 0.905                  |
| TMX2  | Q9Y320      | Thioredoxin-related transmembrane protein 2             | 1.17                             | 0.839 0.013                  |
| TMM33 | P57088      | Transmembrane protein 33                                | 1.08                             | 0.678 0.047                  |
| MRE11 | P49959      | Double-strand break repair protein MRE11                | 1.15                             | 0.940 0.012                  |
| EIF3I | Q13347      | Eukaryotic translation initiation factor 3 subunit I    | 1.07                             | 0.044 0.028                  |
| RDH13 | Q8NBN7      | Retinol dehydrogenase 13                                | 1.56                             | 0.420 0.020                  |
| GNAI1 | P63096      | Guanine nucleotide-binding protein G(i) subunit alpha-1 | 1.42                             | 0.794 0.014                  |
| STMN1 | P16949      | Stathmin                                                | 1.1                              | 0.031 0.682                  |
| RS20  | P60866      | 40S ribosomal protein S20                               | 1.07                             | 0.003 0.037                  |
| RHG01 | Q07960      | Rho GTPase-activating protein 1                         | 1.12                             | 0.002 0.678                  |
| PSA   | P55786      | Puromycin-sensitive aminopeptidase                      | 1.08                             | 0.002 0.208                  |
| CDK1  | P06493      | Cyclin-dependent kinase 1                               | 1.27                             | 0.002 1.000                  |
| PSMD8 | P48556      | 26S proteasome non-ATPase regulatory subunit 8          | 1.12                             | 0.018 0.898                  |
| GDIB  | P50395      | Rab GDP dissociation inhibitor beta                     | 1.09                             | 0.002 0.609                  |
| IDHP  | P48735      | Isocitrate dehydrogenase [NADP], mitochondrial          | 1.25                             | 0.520 0.005                  |
| 1A02  | P01892      | HLA class I histocompatibility antigen, A-2 alpha chain | 1.17                             | 0.008 0.940                  |
| SAP   | P07602      | Prosaposin                                              | 1.23                             | 0.006 0.015                  |
| SAHH  | P23526      | Adenosylhomocysteinase                                  | 1.08                             | 0.002 0.008                  |
| NDKA  | P15531      | Nucleoside diphosphate kinase A                         | 1.06                             | 0.002 0.002                  |

|       |        |                                                                     |      |             |
|-------|--------|---------------------------------------------------------------------|------|-------------|
| SODM  | P04179 | Superoxide dismutase [Mn], mitochondrial                            | 1.12 | 0.503 0.002 |
| M4A14 | Q96JA4 | Membrane-spanning 4-domains subfamily A member 14                   | 1.05 | 0.034 0.147 |
| RPR1B | Q9NQG5 | Regulation of nuclear pre-mRNA domain-containing protein 1B         | 1.21 | 0.561 0.013 |
| CAN1  | P07384 | Calpain-1 catalytic subunit                                         | 1.54 | 0.002 0.002 |
| GSTO1 | P78417 | Glutathione S-transferase omega-1                                   | 1.03 | 0.032 0.045 |
| THIL  | P24752 | Acetyl-CoA acetyltransferase, mitochondrial                         | 1.13 | 0.061 0.002 |
| RACK1 | P63244 | Receptor of activated protein C kinase 1                            | 1.05 | 0.002 0.002 |
| RAC1  | P63000 | Ras-related C3 botulinum toxin substrate 1                          | 1.09 | 0.019 0.337 |
| CAH9  | Q16790 | Carbonic anhydrase 9                                                | 1.64 | 0.002 0.040 |
| FKBP3 | Q00688 | Peptidyl-prolyl cis-trans isomerase FKBP3                           | 1.22 | 0.150 0.010 |
| MDHM  | P40926 | Malate dehydrogenase, mitochondrial                                 | 1.12 | 0.531 0.002 |
| L2GL2 | Q6P1M3 | Lethal(2) giant larvae protein homolog 2                            | 1.66 | 0.028 0.118 |
| SODC  | P00441 | Superoxide dismutase [Cu-Zn]                                        | 1.17 | 0.002 0.121 |
| RRBP1 | Q9P2E9 | Ribosome-binding protein 1                                          | 1.32 | 0.002 0.002 |
| DUT   | P33316 | Deoxyuridine 5'-triphosphate nucleotidohydrolase, mitochondrial     | 1.16 | 0.002 0.728 |
| EIF3F | O00303 | Eukaryotic translation initiation factor 3 subunit F                | 1.09 | 0.002 0.003 |
| BGAL  | P16278 | Beta-galactosidase                                                  | 1.38 | 0.519 0.003 |
| PDIA6 | Q15084 | Protein disulfide-isomerase A6                                      | 1.2  | 0.109 0.002 |
| BAF   | O75531 | Barrier-to-autointegration factor                                   | 1.5  | 0.046 0.801 |
| ESRP1 | Q6NXG1 | Epithelial splicing regulatory protein 1                            | 1.4  | 0.160 0.012 |
| FEN1  | P39748 | Flap endonuclease 1                                                 | 1.32 | 0.002 0.002 |
| CTND1 | O60716 | Catenin delta-1                                                     | 1.21 | 0.735 0.006 |
| RDH11 | Q8TC12 | Retinol dehydrogenase 11                                            | 1.12 | 0.903 0.002 |
| PROF1 | P07737 | Profilin-1                                                          | 1.02 | 0.002 0.002 |
| ERMP1 | Q7Z2K6 | Endoplasmic reticulum metalloproteinase 1                           | 1.25 | 0.956 0.028 |
| ANX11 | P50995 | Annexin A11                                                         | 1.12 | 0.003 0.778 |
| ANXA4 | P09525 | Annexin A4                                                          | 1.23 | 0.002 0.958 |
| IMA1  | P52292 | Importin subunit alpha-1                                            | 1.13 | 0.002 0.002 |
| ACDSB | P45954 | Short/branched chain specific acyl-CoA dehydrogenase, mitochondrial | 1.09 | 0.718 0.038 |
| LIMA1 | Q9UHB6 | LIM domain and actin-binding protein 1                              | 1.14 | 0.981 0.031 |

|       |        |                                                             |      |             |
|-------|--------|-------------------------------------------------------------|------|-------------|
| CADH1 | P12830 | Cadherin-1                                                  | 1.73 | 0.617 0.002 |
| XPO1  | O14980 | Exportin-1                                                  | 1.15 | 0.531 0.003 |
| PRDX6 | P30041 | Peroxiredoxin-6                                             | 1.06 | 0.002 0.002 |
| ECH1  | Q13011 | Delta(3,5)-Delta(2,4)-dienoyl-CoA isomerase, mitochondrial  | 1.17 | 0.025 0.002 |
| ALDOA | P04075 | Fructose-bisphosphate aldolase A                            | 1.05 | 0.002 0.002 |
| NU107 | P57740 | Nuclear pore complex protein Nup107                         | 1.13 | 0.872 0.009 |
| PUR9  | P31939 | Bifunctional purine biosynthesis protein PURH               | 1.11 | 0.002 0.922 |
| PRRC1 | Q96M27 | Protein PRRC1                                               | 1.25 | 0.576 0.043 |
| CLU   | O75153 | Clustered mitochondria protein homolog                      | 1.12 | 0.002 0.100 |
| CPIN1 | Q6FI81 | Anamorsin                                                   | 1.18 | 0.025 0.440 |
| PSME1 | Q06323 | Proteasome activator complex subunit 1                      | 1.3  | 0.015 0.683 |
| PA1B3 | Q15102 | Platelet-activating factor acetylhydrolase IB subunit gamma | 1.55 | 0.042 0.349 |
| ADRO  | P22570 | NADPH:adrenodoxin oxidoreductase, mitochondrial             | 1.27 | 0.074 0.015 |
| RCC2  | Q9P258 | Protein RCC2                                                | 1.19 | 0.020 0.003 |
| ARHGG | Q5VV41 | Rho guanine nucleotide exchange factor 16                   | 1.36 | 0.093 0.027 |
| DPYL2 | Q16555 | Dihydropyrimidinase-related protein 2                       | 1.27 | 0.002 0.873 |
| GBRL2 | P60520 | Gamma-aminobutyric acid receptor-associated protein-like 2  | 1.03 | 0.040 0.017 |
| THIO  | P10599 | Thioredoxin                                                 | 1.07 | 0.002 0.048 |
| PKP3  | Q9Y446 | Plakophilin-3                                               | 1.19 | 0.118 0.002 |
| MDHC  | P40925 | Malate dehydrogenase, cytoplasmic                           | 1.2  | 0.002 0.831 |
| PGM1  | P36871 | Phosphoglucomutase-1                                        | 1.23 | 0.028 0.998 |
| RBP2  | P49792 | E3 SUMO-protein ligase RanBP2                               | 1.19 | 0.273 0.003 |
| SPCS2 | Q15005 | Signal peptidase complex subunit 2                          | 1.38 | 0.503 0.002 |
| SHLB2 | Q9NR46 | Endophilin-B2                                               | 1.33 | 0.007 0.967 |
| CPNE1 | Q99829 | Copine-1                                                    | 1.05 | 0.080 0.034 |
| LASP1 | Q14847 | LIM and SH3 domain protein 1                                | 1.12 | 0.006 0.145 |
| ALDH2 | P05091 | Aldehyde dehydrogenase, mitochondrial                       | 1.19 | 0.002 0.002 |
| H10   | P07305 | Histone H1.0                                                | 1.22 | 0.360 0.030 |
| EF1D  | P29692 | Elongation factor 1-delta                                   | 1.13 | 0.002 0.387 |
| XRCC6 | P12956 | X-ray repair cross-complementing protein 6                  | 1.11 | 0.643 0.002 |

|       |        |                                                                      |      |             |
|-------|--------|----------------------------------------------------------------------|------|-------------|
| DD19A | Q9NUU7 | ATP-dependent RNA helicase DDX19A                                    | 1.05 | 0.002 0.014 |
| FAS   | P49327 | Fatty acid synthase                                                  | 1.04 | 0.002 0.002 |
| NEUA  | Q8NFW8 | N-acylneuraminate cytidyltransferase                                 | 1.16 | 0.263 0.002 |
| SUCA  | P53597 | Succinate--CoA ligase [ADP/GDP-forming] subunit alpha, mitochondrial | 1.05 | 0.167 0.002 |
| ENOB  | P13929 | Beta-enolase                                                         | 1.1  | 0.034 0.561 |
| K1C9  | P35527 | Keratin, type I cytoskeletal 9                                       | 1.57 | 0.811 0.017 |
| K2C80 | Q6KB66 | Keratin, type II cytoskeletal 80                                     | 1.14 | 0.121 0.010 |
| DPEP1 | P16444 | Dipeptidase 1                                                        | 2.28 | 0.002 0.002 |
| TBA4A | P68366 | Tubulin alpha-4A chain                                               | 1.08 | 0.004 0.137 |
| PSB4  | P28070 | Proteasome subunit beta type-4                                       | 1.17 | 0.016 0.145 |
| TBCA  | O75347 | Tubulin-specific chaperone A                                         | 1.19 | 0.009 0.591 |
| SPEB  | Q9BSE5 | Agmatinase, mitochondrial                                            | 1.24 | 0.307 0.003 |
| ENPL  | P14625 | Endoplasmin                                                          | 1.07 | 0.002 0.002 |
| RAGP1 | P46060 | Ran GTPase-activating protein 1                                      | 1.2  | 0.022 0.936 |
| FDFT  | P37268 | Squalene synthase                                                    | 1.38 | 0.015 0.487 |
| EDC4  | Q6P2E9 | Enhancer of mRNA-decapping protein 4                                 | 1.13 | 0.916 0.042 |
| MSH6  | P52701 | DNA mismatch repair protein Msh6                                     | 1.21 | 0.246 0.002 |
| PFD6  | O15212 | Prefoldin subunit 6                                                  | 1.15 | 0.025 0.994 |
| PDIA4 | P13667 | Protein disulfide-isomerase A4                                       | 1.04 | 0.002 0.002 |
| TXD17 | Q9BRA2 | Thioredoxin domain-containing protein 17                             | 1.13 | 0.004 0.455 |
| 1433S | P31947 | 14-3-3 protein sigma                                                 | 1.25 | 0.010 0.431 |
| BOLA2 | Q9H3K6 | BolA-like protein 2                                                  | 1.34 | 0.003 0.243 |
| UB2V2 | Q15819 | Ubiquitin-conjugating enzyme E2 variant 2                            | 1.19 | 0.042 0.766 |
| IF2M  | P46199 | Translation initiation factor IF-2, mitochondrial                    | 1.48 | 0.503 0.045 |
| SCRB2 | Q14108 | Lysosome membrane protein 2                                          | 1.24 | 0.158 0.013 |
| S10A4 | P26447 | Protein S100-A4                                                      | 1.16 | 0.002 0.005 |
| VRK1  | Q99986 | Serine/threonine-protein kinase VRK1                                 | 1.19 | 0.462 0.033 |
| CAP1  | Q01518 | Adenylyl cyclase-associated protein 1                                | 1.1  | 0.007 0.151 |
| VP26A | O75436 | Vacuolar protein sorting-associated protein 26A                      | 1.16 | 0.020 0.647 |
| TKFC  | Q3LXA3 | Triokinase/FMN cyclase                                               | 1.65 | 0.015 0.421 |

|       |        |                                                                |      |             |
|-------|--------|----------------------------------------------------------------|------|-------------|
| TBCB  | Q99426 | Tubulin-folding cofactor B                                     | 1.1  | 0.048 0.791 |
| RS12  | P25398 | 40S ribosomal protein S12                                      | 1    | 0.002 0.034 |
| C1TC  | P11586 | C-1-tetrahydrofolate synthase, cytoplasmic                     | 1.13 | 0.002 0.942 |
| TEBP  | Q15185 | Prostaglandin E synthase 3                                     | 1.14 | 0.020 0.936 |
| SAR1A | Q9NR31 | GTP-binding protein SAR1a                                      | 1.29 | 0.045 0.017 |
| VILI  | P09327 | Villin-1                                                       | 1.25 | 0.002 0.002 |
| IDH3A | P50213 | Isocitrate dehydrogenase [NAD] subunit alpha, mitochondrial    | 1.03 | 0.013 0.009 |
| CSDE1 | O75534 | Cold shock domain-containing protein E1                        | 1.22 | 0.013 0.776 |
| CNN2  | Q99439 | Calponin-2                                                     | 1.28 | 0.039 0.249 |
| TKT   | P29401 | Transketolase                                                  | 1.19 | 0.002 0.002 |
| LG3BP | Q08380 | Galectin-3-binding protein                                     | 1.25 | 0.015 0.002 |
| MACD1 | Q9BQ69 | O-acetyl-ADP-ribose deacetylase MACROD1                        | 1.39 | 0.002 0.252 |
| CPNE3 | O75131 | Copine-3                                                       | 1.12 | 0.008 0.028 |
| CCDC6 | Q16204 | Coiled-coil domain-containing protein 6                        | 1.22 | 0.730 0.038 |
| CP4V2 | Q6ZWL3 | Cytochrome P450 4V2                                            | 3.06 | 0.099 0.050 |
| CTNA1 | P35221 | Catenin alpha-1                                                | 1.39 | 0.031 0.002 |
| IPYR  | Q15181 | Inorganic pyrophosphatase                                      | 1.25 | 0.007 0.872 |
| K2C8  | P05787 | Keratin, type II cytoskeletal 8                                | 1.19 | 0.682 0.002 |
| PARK7 | Q99497 | Protein DJ-1                                                   | 1.12 | 0.002 0.028 |
| NQO1  | P15559 | NAD(P)H dehydrogenase [quinone] 1                              | 1.23 | 0.009 0.121 |
| NOB1  | Q9ULX3 | RNA-binding protein NOB1                                       | 1.15 | 0.004 0.525 |
| DDB1  | Q16531 | DNA damage-binding protein 1                                   | 1.09 | 0.002 0.355 |
| BAIP2 | Q9UQB8 | Brain-specific angiogenesis inhibitor 1-associated protein 2   | 1.24 | 0.017 0.203 |
| ODPX  | O00330 | Pyruvate dehydrogenase protein X component, mitochondrial      | 1.46 | 0.081 0.032 |
| A1AT  | P01009 | Alpha-1-antitrypsin                                            | 2.33 | 0.006 0.002 |
| ACADV | P49748 | Very long-chain specific acyl-CoA dehydrogenase, mitochondrial | 1.21 | 0.034 0.002 |
| BSN   | Q9UPA5 | Protein bassoon                                                | 3.31 | 0.084 0.036 |
| PCY1A | P49585 | Choline-phosphate cytidylyltransferase A                       | 1.03 | 0.007 0.017 |
| TOP2A | P11388 | DNA topoisomerase 2-alpha                                      | 1.23 | 0.002 0.870 |
| ANXA3 | P12429 | Annexin A3                                                     | 1.13 | 0.002 0.002 |

|       |        |                                                                                                                  |      |             |
|-------|--------|------------------------------------------------------------------------------------------------------------------|------|-------------|
| LYAG  | P10253 | Lysosomal alpha-glucosidase                                                                                      | 1.39 | 0.050 0.057 |
| P5CR1 | P32322 | Pyrroline-5-carboxylate reductase 1, mitochondrial                                                               | 1.23 | 0.970 0.002 |
| ODO2  | P36957 | Dihydrolipoyllysine-residue succinyltransferase component of 2-oxoglutarate dehydrogenase complex, mitochondrial | 1.19 | 0.543 0.026 |
| EFHD2 | Q96C19 | EF-hand domain-containing protein D2                                                                             | 1.13 | 0.009 0.031 |
| ML12A | P19105 | Myosin regulatory light chain 12A                                                                                | 1.13 | 0.002 0.454 |
| VTNC  | P04004 | Vitronectin                                                                                                      | 1.55 | 0.120 0.040 |
| SUCB2 | Q96I99 | Succinate--CoA ligase [GDP-forming] subunit beta, mitochondrial                                                  | 1.19 | 0.117 0.002 |
| SKP1  | P63208 | S-phase kinase-associated protein 1                                                                              | 1.25 | 0.002 0.960 |
| NAL13 | Q86W25 | NACHT, LRR and PYD domains-containing protein 13                                                                 | 8.51 | 0.002 0.002 |
| LEG3  | P17931 | Galectin-3                                                                                                       | 1.06 | 0.002 0.050 |
| LA    | P05455 | Lupus La protein                                                                                                 | 1.36 | 0.055 0.006 |
| GRN   | P28799 | Granulins                                                                                                        | 1.44 | 0.022 0.458 |
| CNPY2 | Q9Y2B0 | Protein canopy homolog 2                                                                                         | 1.17 | 0.438 0.009 |
| PP4R4 | Q6NUP7 | Serine/threonine-protein phosphatase 4 regulatory subunit 4                                                      | 2.96 | 0.009 0.017 |
| UNC79 | Q9P2D8 | Protein unc-79 homolog                                                                                           | 3.03 | 0.131 0.040 |
| K1C23 | Q9C075 | Keratin, type I cytoskeletal 23                                                                                  | 1.89 | 0.118 0.020 |
| EF1G  | P26641 | Elongation factor 1-gamma                                                                                        | 1.17 | 0.002 0.067 |
| RD23B | P54727 | UV excision repair protein RAD23 homolog B                                                                       | 1.12 | 0.003 0.967 |
| SLX4  | Q8IY92 | Structure-specific endonuclease subunit SLX4                                                                     | 1.45 | 0.016 0.070 |
| FKB1A | P62942 | Peptidyl-prolyl cis-trans isomerase FKBP1A                                                                       | 1.08 | 0.020 0.182 |
| CH10  | P61604 | 10 kDa heat shock protein, mitochondrial                                                                         | 1.11 | 0.002 0.002 |
| BZW2  | Q9Y6E2 | Basic leucine zipper and W2 domain-containing protein 2                                                          | 1.16 | 0.048 0.439 |
| SCRIB | Q14160 | Protein scribble homolog                                                                                         | 1.3  | 0.009 0.014 |
| K2C1  | P04264 | Keratin, type II cytoskeletal 1                                                                                  | 1.2  | 0.009 0.002 |
| GGH   | Q92820 | Gamma-glutamyl hydrolase                                                                                         | 1.26 | 0.968 0.006 |
| XRCC5 | P13010 | X-ray repair cross-complementing protein 5                                                                       | 1.08 | 0.326 0.002 |
| RFA1  | P27694 | Replication protein A 70 kDa DNA-binding subunit                                                                 | 1.28 | 0.002 0.002 |
| RS6   | P62753 | 40S ribosomal protein S6                                                                                         | 1.05 | 0.015 0.084 |
| MAGA4 | P43358 | Melanoma-associated antigen 4                                                                                    | 2.32 | 0.010 0.002 |

|       |        |                                                                 |      |             |
|-------|--------|-----------------------------------------------------------------|------|-------------|
| ASAH1 | Q13510 | Acid ceramidase                                                 | 1.44 | 0.617 0.010 |
| CHM4B | Q9H444 | Charged multivesicular body protein 4b                          | 1.26 | 0.002 0.448 |
| K1C18 | P05783 | Keratin, type I cytoskeletal 18                                 | 1.3  | 0.002 0.002 |
| RS18  | P62269 | 40S ribosomal protein S18                                       | 1.08 | 0.002 0.002 |
| PSA7  | O14818 | Proteasome subunit alpha type-7                                 | 1.13 | 0.002 0.787 |
| TMOD2 | Q9NZR1 | Tropomodulin-2                                                  | 1.45 | 0.035 0.998 |
| RET1  | P09455 | Retinol-binding protein 1                                       | 1.35 | 0.007 0.265 |
| S100P | P25815 | Protein S100-P                                                  | 1.4  | 0.058 0.002 |
| 1A24  | P05534 | HLA class I histocompatibility antigen, A-24 alpha chain        | 1.74 | 0.030 0.974 |
| UBA1  | P22314 | Ubiquitin-like modifier-activating enzyme 1                     | 1.17 | 0.002 0.002 |
| AHSA1 | O95433 | Activator of 90 kDa heat shock protein ATPase homolog 1         | 1.26 | 0.003 0.721 |
| ENOA  | P06733 | Alpha-enolase                                                   | 1.02 | 0.002 0.002 |
| RPOM  | O00411 | DNA-directed RNA polymerase, mitochondrial                      | 1.32 | 0.833 0.039 |
| 1433B | P31946 | 14-3-3 protein beta/alpha                                       | 1.11 | 0.002 0.880 |
| MRCKB | Q9Y5S2 | Serine/threonine-protein kinase MRCK beta                       | 3.21 | 0.286 0.034 |
| ODPB  | P11177 | Pyruvate dehydrogenase E1 component subunit beta, mitochondrial | 1.17 | 0.003 0.003 |
| DHSO  | Q00796 | Sorbitol dehydrogenase                                          | 1.36 | 0.015 0.280 |
| NKD1  | Q969G9 | Protein naked cuticle homolog 1                                 | 1.17 | 0.002 0.893 |
| NASP  | P49321 | Nuclear autoantigenic sperm protein                             | 1.2  | 0.127 0.045 |
| CATD  | P07339 | Cathepsin D                                                     | 1.46 | 0.002 0.002 |
| NACA  | Q13765 | Nascent polypeptide-associated complex subunit alpha            | 1.17 | 0.002 0.009 |
| TEKT4 | Q8WW24 | Tektin-4                                                        | 1.53 | 0.044 0.064 |
| CDC42 | P60953 | Cell division control protein 42 homolog                        | 1.17 | 0.007 0.003 |
| HPRT  | P00492 | Hypoxanthine-guanine phosphoribosyltransferase                  | 1.16 | 0.036 0.456 |
| DHCR7 | Q9UBM7 | 7-dehydrocholesterol reductase                                  | 1.1  | 0.002 0.229 |
| NLTP  | P22307 | Non-specific lipid-transfer protein                             | 1.17 | 0.310 0.013 |
| REV3L | O60673 | DNA polymerase zeta catalytic subunit                           | 10   | 0.016 0.002 |
| EDF1  | O60869 | Endothelial differentiation-related factor 1                    | 1.17 | 0.017 0.081 |
| AK1A1 | P14550 | Alcohol dehydrogenase [NADP(+)]                                 | 1.41 | 0.002 0.069 |
| LDHA  | P00338 | L-lactate dehydrogenase A chain                                 | 1.1  | 0.002 0.010 |

|       |        |                                                             |      |             |
|-------|--------|-------------------------------------------------------------|------|-------------|
| FKBP9 | O95302 | Peptidyl-prolyl cis-trans isomerase                         | 1.26 | 0.015 0.983 |
| RS27L | Q71UM5 | 40S ribosomal protein S27-like                              | 1.16 | 0.002 0.710 |
| G6PI  | P06744 | Glucose-6-phosphate isomerase                               | 1.16 | 0.002 0.780 |
| SUMO2 | P61956 | Small ubiquitin-related modifier 2                          | 1.29 | 0.002 0.915 |
| CPT2  | P23786 | Carnitine O-palmitoyltransferase 2, mitochondrial           | 1.02 | 0.110 0.028 |
| SH3L3 | Q9H299 | SH3 domain-binding glutamic acid-rich-like protein 3        | 1.3  | 0.006 0.010 |
| DYN2  | P50570 | Dynamamin-2                                                 | 1.16 | 0.039 0.271 |
| API5  | Q9BZZ5 | Apoptosis inhibitor 5                                       | 1.15 | 0.273 0.002 |
| NUDC  | Q9Y266 | Nuclear migration protein nudC                              | 1.06 | 0.002 0.028 |
| INT10 | Q9NVR2 | Integrator complex subunit 10                               | 3.45 | 0.099 0.028 |
| NIBL1 | Q96TA1 | Niban-like protein 1                                        | 1.26 | 0.084 0.015 |
| TYB10 | P63313 | Thymosin beta-10                                            | 1.3  | 0.030 0.544 |
| PLSL  | P13796 | Plastin-2                                                   | 1.19 | 0.002 0.623 |
| TCP4  | P53999 | Activated RNA polymerase II transcriptional coactivator p15 | 1.17 | 0.531 0.002 |
| CUTC  | Q9NTM9 | Copper homeostasis protein cutC homolog                     | 1.57 | 0.034 0.010 |
| PGK1  | P00558 | Phosphoglycerate kinase 1                                   | 1.11 | 0.002 0.003 |
| PCBP1 | Q15365 | Poly(rC)-binding protein 1                                  | 1.1  | 0.031 0.772 |
| GSHB  | P48637 | Glutathione synthetase                                      | 1.36 | 0.002 0.005 |
| KCRU  | P12532 | Creatine kinase U-type, mitochondrial                       | 1.15 | 0.107 0.002 |
| HSP72 | P54652 | Heat shock-related 70 kDa protein 2                         | 1.48 | 0.020 0.017 |
| CHDH  | Q8NE62 | Choline dehydrogenase, mitochondrial                        | 1.24 | 0.002 0.008 |
| EFTU  | P49411 | Elongation factor Tu, mitochondrial                         | 1.07 | 0.039 0.002 |
| PHS   | P61457 | Pterin-4-alpha-carbinolamine dehydratase                    | 1.16 | 0.002 0.084 |
| ABHEB | Q96IU4 | Protein ABHD14B                                             | 1.35 | 0.002 0.374 |
| RS19  | P39019 | 40S ribosomal protein S19                                   | 1.03 | 0.002 0.002 |
| RECQ1 | P46063 | ATP-dependent DNA helicase Q1                               | 1.08 | 0.463 0.002 |
| AAAT  | Q15758 | Neutral amino acid transporter B(0)                         | 1.18 | 0.203 0.002 |
| LIN7C | Q9NUP9 | Protein lin-7 homolog C                                     | 1.25 | 0.114 0.014 |
| ACLY  | P53396 | ATP-citrate synthase                                        | 1.13 | 0.002 0.081 |
| ACTN1 | P12814 | Alpha-actinin-1                                             | 1.24 | 0.002 0.002 |

|       |        |                                                                                                          |      |             |
|-------|--------|----------------------------------------------------------------------------------------------------------|------|-------------|
| STON2 | Q8WXE9 | Stonin-2                                                                                                 | 3.37 | 0.002 0.303 |
| ODP2  | P10515 | Dihydrolipoyllysine-residue acetyltransferase component of pyruvate dehydrogenase complex, mitochondrial | 1.26 | 0.003 0.002 |
| IDHC  | O75874 | Isocitrate dehydrogenase [NADP] cytoplasmic                                                              | 1.31 | 0.002 0.899 |
| ODPA  | P08559 | Pyruvate dehydrogenase E1 component subunit alpha, somatic form, mitochondrial                           | 1.12 | 0.790 0.002 |
| GLOD4 | Q9HC38 | Glyoxalase domain-containing protein 4                                                                   | 1.15 | 0.048 0.751 |
| PRDX5 | P30044 | Peroxiredoxin-5, mitochondrial                                                                           | 1.2  | 0.735 0.014 |
| 44448 | Q9UHD8 | Septin-9                                                                                                 | 1.19 | 0.002 0.558 |
| PPIA  | P62937 | Peptidyl-prolyl cis-trans isomerase A                                                                    | 1    | 0.002 0.002 |
| EIF3B | P55884 | Eukaryotic translation initiation factor 3 subunit B                                                     | 1.06 | 0.002 0.003 |
| CPT1A | P50416 | Carnitine O-palmitoyltransferase 1, liver isoform                                                        | 1.27 | 0.029 0.011 |
| NU133 | Q8WUM0 | Nuclear pore complex protein Nup133                                                                      | 1.14 | 0.676 0.040 |
| PCTL  | Q9Y365 | PCTP-like protein                                                                                        | 2.02 | 0.004 0.097 |
| COF1  | P23528 | Cofilin-1                                                                                                | 1.11 | 0.002 0.002 |
| TRI29 | Q14134 | Tripartite motif-containing protein 29                                                                   | 1.33 | 0.103 0.024 |
| ERP44 | Q9BS26 | Endoplasmic reticulum resident protein 44                                                                | 1.25 | 0.028 0.040 |
| K1C17 | Q04695 | Keratin, type I cytoskeletal 17                                                                          | 2.32 | 0.871 0.002 |
| AP3B1 | O00203 | AP-3 complex subunit beta-1                                                                              | 1.23 | 0.048 0.355 |
| PYGL  | P06737 | Glycogen phosphorylase, liver form                                                                       | 1.17 | 0.020 0.384 |
| PCY2  | Q99447 | Ethanolamine-phosphate cytidylyltransferase                                                              | 1.05 | 0.004 0.269 |
| PUR6  | P22234 | Multifunctional protein ADE2                                                                             | 1.11 | 0.002 0.998 |
| ARC1B | O15143 | Actin-related protein 2/3 complex subunit 1B                                                             | 1.15 | 0.044 0.766 |
| HS12A | O43301 | Heat shock 70 kDa protein 12A                                                                            | 1.35 | 0.024 0.547 |
| P4HA1 | P13674 | Prolyl 4-hydroxylase subunit alpha-1                                                                     | 1.28 | 0.020 0.994 |

Table S2 List of 169 down-regulated proteins

| <b>gene</b> | <b>Uniprot IDs</b> | <b>Description</b>                                                           | <b>Mean_Ratio<br/>treated-VS-control</b> | <b>Qvalue<br/>treated-VS-control</b> |
|-------------|--------------------|------------------------------------------------------------------------------|------------------------------------------|--------------------------------------|
| IQGA1       | P46940             | Ras GTPase-activating-like protein IQGAP1                                    | 0.82                                     | 0.002 0.002                          |
| IF4G2       | P78344             | Eukaryotic translation initiation factor 4 gamma 2                           | 0.88                                     | 0.928 0.017                          |
| NCOA5       | Q9HCD5             | Nuclear receptor coactivator 5                                               | 0.83                                     | 0.009 0.186                          |
| WDR74       | Q6RFH5             | WD repeat-containing protein 74                                              | 0.86                                     | 0.967 0.014                          |
| STT3A       | P46977             | Dolichyl-diphosphooligosaccharide--protein glycosyltransferase subunit STT3A | 0.83                                     | 0.654 0.014                          |
| H13         | P16402             | Histone H1.3                                                                 | 0.92                                     | 0.034 0.122                          |
| LRC59       | Q96AG4             | Leucine-rich repeat-containing protein 59                                    | 0.84                                     | 0.002 0.052                          |
| BCLF1       | Q9NYF8             | Bcl-2-associated transcription factor 1                                      | 0.85                                     | 0.089 0.002                          |
| GRWD1       | Q9BQ67             | Glutamate-rich WD repeat-containing protein 1                                | 0.89                                     | 0.959 0.002                          |
| LEG1        | P09382             | Galectin-1                                                                   | 0.87                                     | 0.002 0.002                          |
| PESC        | O00541             | Pescadillo homolog                                                           | 0.83                                     | 0.014 0.002                          |
| HXK2        | P52789             | Hexokinase-2                                                                 | 0.74                                     | 0.226 0.002                          |
| CAN2        | P17655             | Calpain-2 catalytic subunit                                                  | 0.95                                     | 0.316 0.005                          |
| DHX9        | Q08211             | ATP-dependent RNA helicase A                                                 | 0.88                                     | 0.043 0.002                          |
| SPTB2       | Q01082             | Spectrin beta chain, non-erythrocytic 1                                      | 0.85                                     | 0.002 0.002                          |
| G6PD        | P11413             | Glucose-6-phosphate 1-dehydrogenase                                          | 0.94                                     | 0.424 0.003                          |
| H31         | P68431             | Histone H3.1                                                                 | 0.94                                     | 0.003 0.310                          |
| HMOX2       | P30519             | Heme oxygenase 2                                                             | 0.84                                     | 0.039 0.310                          |
| MBB1A       | Q9BQG0             | Myb-binding protein 1A                                                       | 0.77                                     | 0.003 0.002                          |
| TPIS        | P60174             | Triosephosphate isomerase                                                    | 0.98                                     | 0.002 0.002                          |
| PHB2        | Q99623             | Prohibitin-2                                                                 | 0.86                                     | 0.002 0.002                          |
| TMEDA       | P49755             | Transmembrane emp24 domain-containing protein 10                             | 0.99                                     | 0.074 0.003                          |
| ECHA        | P40939             | Trifunctional enzyme subunit alpha, mitochondrial                            | 0.94                                     | 0.002 0.059                          |
| MIMIT       | Q8N183             | Mimitin, mitochondrial                                                       | 0.9                                      | 0.034 0.182                          |
| LCLT1       | Q6UWP7             | Lysocardiolipin acyltransferase 1                                            | 0.93                                     | 0.031 0.522                          |

|       |        |                                                       |      |             |
|-------|--------|-------------------------------------------------------|------|-------------|
| RL1D1 | O76021 | Ribosomal L1 domain-containing protein 1              | 0.82 | 0.334 0.008 |
| LONM  | P36776 | Lon protease homolog, mitochondrial                   | 0.97 | 0.022 0.017 |
| GSTP1 | P09211 | Glutathione S-transferase P                           | 0.96 | 0.053 0.002 |
| EPHA2 | P29317 | Ephrin type-A receptor 2                              | 0.78 | 0.049 0.738 |
| PCNA  | P12004 | Proliferating cell nuclear antigen                    | 0.97 | 0.008 0.002 |
| NH2L1 | P55769 | NHP2-like protein 1                                   | 0.9  | 0.036 0.880 |
| RS3   | P23396 | 40S ribosomal protein S3                              | 0.98 | 0.010 0.002 |
| IF6   | P56537 | Eukaryotic translation initiation factor 6            | 0.87 | 0.980 0.002 |
| FABP5 | Q01469 | Fatty acid-binding protein, epidermal                 | 0.99 | 0.002 0.002 |
| SPEE  | P19623 | Spermidine synthase                                   | 0.9  | 0.564 0.002 |
| ANXA1 | P04083 | Annexin A1                                            | 0.53 | 0.007 0.002 |
| P5CS  | P54886 | Delta-1-pyrroline-5-carboxylate synthase              | 0.88 | 0.002 0.067 |
| RS23  | P62266 | 40S ribosomal protein S23                             | 0.68 | 0.202 0.044 |
| RALY  | Q9UKM9 | RNA-binding protein Raly                              | 0.83 | 0.002 0.002 |
| TMX1  | Q9H3N1 | Thioredoxin-related transmembrane protein 1           | 0.85 | 0.103 0.016 |
| RS11  | P62280 | 40S ribosomal protein S11                             | 0.98 | 0.020 0.003 |
| RL38  | P63173 | 60S ribosomal protein L38                             | 0.83 | 0.485 0.010 |
| CYC   | P99999 | Cytochrome c                                          | 0.92 | 0.002 0.327 |
| HMGA1 | P17096 | High mobility group protein HMG-I/HMG-Y               | 0.91 | 0.003 0.850 |
| MK67I | Q9BYG3 | MKI67 FHA domain-interacting nucleolar phosphoprotein | 0.7  | 0.241 0.010 |
| SFPQ  | P23246 | Splicing factor, proline- and glutamine-rich          | 0.83 | 0.002 0.002 |
| RS15A | P62244 | 40S ribosomal protein S15a                            | 0.92 | 0.933 0.002 |
| CSN2  | P61201 | COP9 signalosome complex subunit 2                    | 0.6  | 0.002 0.967 |
| ABCD3 | P28288 | ATP-binding cassette sub-family D member 3            | 0.89 | 0.002 0.979 |
| PTRF  | Q6NZI2 | Polymerase I and transcript release factor            | 0.76 | 0.053 0.023 |
| DDX27 | Q96GQ7 | Probable ATP-dependent RNA helicase DDX27             | 0.85 | 0.004 0.003 |
| TAGL2 | P37802 | Transgelin-2                                          | 0.91 | 0.065 0.002 |
| DDX47 | Q9H0S4 | Probable ATP-dependent RNA helicase DDX47             | 0.84 | 0.359 0.048 |
| IF4A1 | P60842 | Eukaryotic initiation factor 4A-I                     | 1    | 0.002 0.002 |
| RBMX  | P38159 | RNA-binding motif protein, X chromosome               | 0.88 | 0.002 0.966 |

|       |        |                                                                             |      |             |
|-------|--------|-----------------------------------------------------------------------------|------|-------------|
| KHDR1 | Q07666 | KH domain-containing, RNA-binding, signal transduction-associated protein 1 | 0.89 | 0.044 0.889 |
| RS13  | P62277 | 40S ribosomal protein S13                                                   | 0.98 | 0.096 0.019 |
| TIM13 | Q9Y5L4 | Mitochondrial import inner membrane translocase subunit Tim13               | 0.89 | 0.039 0.923 |
| ANXA2 | P07355 | Annexin A2                                                                  | 0.9  | 0.779 0.002 |
| MOES  | P26038 | Moesin                                                                      | 0.86 | 0.111 0.002 |
| MTUS1 | Q9ULD2 | Microtubule-associated tumor suppressor 1                                   | 0.87 | 0.045 0.364 |
| RL17  | P18621 | 60S ribosomal protein L17                                                   | 0.81 | 0.626 0.048 |
| H1X   | Q92522 | Histone H1x                                                                 | 0.81 | 0.002 0.002 |
| ANXA5 | P08758 | Annexin A5                                                                  | 0.63 | 0.172 0.002 |
| VIME  | P08670 | Vimentin                                                                    | 0.34 | 0.002 0.002 |
| FSCN1 | Q16658 | Fascin                                                                      | 0.97 | 0.010 0.012 |
| EF2   | P13639 | Elongation factor 2                                                         | 0.96 | 0.009 0.002 |
| SDHB  | P21912 | Succinate dehydrogenase [ubiquinone] iron-sulfur subunit, mitochondrial     | 0.74 | 0.122 0.002 |
| PLST  | P13797 | Plastin-3                                                                   | 0.83 | 0.580 0.006 |
| GRSF1 | Q12849 | G-rich sequence factor 1                                                    | 0.89 | 0.471 0.002 |
| ATD3A | Q9NVI7 | ATPase family AAA domain-containing protein 3A                              | 0.85 | 0.006 0.042 |
| MPRI  | P11717 | Cation-independent mannose-6-phosphate receptor                             | 0.73 | 0.020 0.002 |
| NOC2L | Q9Y3T9 | Nucleolar complex protein 2 homolog                                         | 0.88 | 0.003 0.291 |
| PRP6  | O94906 | Pre-mRNA-processing factor 6                                                | 0.88 | 0.002 0.390 |
| 4F2   | P08195 | 4F2 cell-surface antigen heavy chain                                        | 0.84 | 0.002 0.002 |
| CLIC1 | O00299 | Chloride intracellular channel protein 1                                    | 0.92 | 0.202 0.009 |
| FACE1 | O75844 | CAAX prenyl protease 1 homolog                                              | 0.85 | 0.002 0.723 |
| G3P   | P04406 | Glyceraldehyde-3-phosphate dehydrogenase                                    | 0.9  | 0.002 0.002 |
| DDX21 | Q9NR30 | Nucleolar RNA helicase 2                                                    | 0.82 | 0.003 0.002 |
| CALR  | P27797 | Calreticulin                                                                | 0.77 | 0.002 0.923 |
| CK5P3 | Q96JB5 | CDK5 regulatory subunit-associated protein 3                                | 0.86 | 0.871 0.017 |
| HNRDL | O14979 | Heterogeneous nuclear ribonucleoprotein D-like                              | 0.85 | 0.173 0.020 |
| ZYX   | Q15942 | Zyxin                                                                       | 0.81 | 0.709 0.003 |
| PEBP1 | P30086 | Phosphatidylethanolamine-binding protein 1                                  | 0.98 | 0.002 0.002 |

|       |        |                                                            |      |             |
|-------|--------|------------------------------------------------------------|------|-------------|
| ROA3  | P51991 | Heterogeneous nuclear ribonucleoprotein A3                 | 0.95 | 0.002 0.161 |
| RBM14 | Q96PK6 | RNA-binding protein 14                                     | 0.86 | 0.002 0.349 |
| SC61B | P60468 | Protein transport protein Sec61 subunit beta               | 0.73 | 0.002 0.048 |
| H2AZ  | P0C0S5 | Histone H2A.Z                                              | 0.73 | 0.021 0.575 |
| HNRPM | P52272 | Heterogeneous nuclear ribonucleoprotein M                  | 0.88 | 0.002 0.003 |
| IPO4  | Q8TEX9 | Importin-4                                                 | 0.89 | 0.875 0.045 |
| H2B1J | P06899 | Histone H2B type 1-J                                       | 0.88 | 0.002 0.768 |
| SYTC  | P26639 | Threonine--tRNA ligase, cytoplasmic                        | 0.89 | 0.657 0.002 |
| ILEU  | P30740 | Leukocyte elastase inhibitor                               | 0.92 | 0.236 0.025 |
| HYEP  | P07099 | Epoxide hydrolase 1                                        | 0.85 | 0.013 0.874 |
| OSBL3 | Q9H4L5 | Oxysterol-binding protein-related protein 3                | 0.86 | 0.034 0.327 |
| TR150 | Q9Y2W1 | Thyroid hormone receptor-associated protein 3              | 0.93 | 0.002 0.735 |
| HNRPC | P07910 | Heterogeneous nuclear ribonucleoproteins C1/C2             | 0.86 | 0.002 0.283 |
| FKB11 | Q9NYL4 | Peptidyl-prolyl cis-trans isomerase FKBP11                 | 0.97 | 0.002 0.048 |
| HPDL  | Q96IR7 | 4-hydroxyphenylpyruvate dioxygenase-like protein           | 0.95 | 0.039 0.348 |
| FACR1 | Q8WVX9 | Fatty acyl-CoA reductase 1                                 | 0.8  | 0.376 0.033 |
| TSN19 | P0C672 | Putative tetraspanin-19                                    | 0.32 | 0.117 0.019 |
| BASI  | P35613 | Basigin                                                    | 0.92 | 0.003 0.928 |
| TOP1  | P11387 | DNA topoisomerase 1                                        | 0.8  | 0.002 0.002 |
| PHB   | P35232 | Prohibitin                                                 | 0.81 | 0.002 0.002 |
| ASPH  | Q12797 | Aspartyl/asparaginyl beta-hydroxylase                      | 0.86 | 0.015 0.688 |
| K1C15 | P19012 | Keratin, type I cytoskeletal 15                            | 1    | 0.007 0.018 |
| MPRD  | P20645 | Cation-dependent mannose-6-phosphate receptor              | 0.83 | 0.493 0.002 |
| H15   | P16401 | Histone H1.5                                               | 0.87 | 0.002 0.892 |
| IPO5  | O00410 | Importin-5                                                 | 0.86 | 0.819 0.012 |
| 6PGD  | P52209 | 6-phosphogluconate dehydrogenase, decarboxylating          | 0.99 | 0.009 0.002 |
| TOM70 | O94826 | Mitochondrial import receptor subunit TOM70                | 0.96 | 0.002 0.002 |
| C1TM  | Q6UB35 | Monofunctional C1-tetrahydrofolate synthase, mitochondrial | 0.89 | 0.007 0.871 |
| DDX56 | Q9NY93 | Probable ATP-dependent RNA helicase DDX56                  | 0.87 | 0.834 0.002 |
| FLNA  | P21333 | Filamin-A                                                  | 0.89 | 0.117 0.002 |

|       |        |                                                                   |      |             |
|-------|--------|-------------------------------------------------------------------|------|-------------|
| NPM   | P06748 | Nucleophosmin                                                     | 0.77 | 0.002 0.002 |
| MYOF  | Q9NZM1 | Myoferlin                                                         | 0.83 | 0.002 0.002 |
| DDX54 | Q8TDD1 | ATP-dependent RNA helicase DDX54                                  | 0.75 | 0.015 0.002 |
| NEST  | P48681 | Nestin                                                            | 0.63 | 0.002 0.002 |
| H2B1H | Q93079 | Histone H2B type 1-H                                              | 0.87 | 0.002 0.147 |
| RRP12 | Q5JTH9 | RRP12-like protein                                                | 0.79 | 0.008 0.017 |
| KPYM  | P14618 | Pyruvate kinase PKM                                               | 0.93 | 0.002 0.002 |
| GTR1  | P11166 | Solute carrier family 2, facilitated glucose transporter member 1 | 0.96 | 0.004 0.003 |
| S12A2 | P55011 | Solute carrier family 12 member 2                                 | 0.76 | 0.209 0.006 |
| RFOX2 | O43251 | RNA binding protein fox-1 homolog 2                               | 0.78 | 0.646 0.026 |
| FUBP1 | Q96AE4 | Far upstream element-binding protein 1                            | 0.94 | 0.002 0.140 |
| CISD1 | Q9NZ45 | CDGSH iron-sulfur domain-containing protein 1                     | 0.81 | 0.007 0.267 |
| B2MG  | P61769 | Beta-2-microglobulin                                              | 0.93 | 0.002 0.090 |
| ARP3  | P61158 | Actin-related protein 3                                           | 0.86 | 0.718 0.002 |
| HNRPR | O43390 | Heterogeneous nuclear ribonucleoprotein R                         | 0.91 | 0.002 0.970 |
| PSMF1 | Q92530 | Proteasome inhibitor PI31 subunit                                 | 0.93 | 0.770 0.022 |
| PURA2 | P30520 | Adenylosuccinate synthetase isozyme 2                             | 0.74 | 0.910 0.040 |
| WDR12 | Q9GZL7 | Ribosome biogenesis protein WDR12                                 | 0.83 | 0.019 0.019 |
| COX6C | P09669 | Cytochrome c oxidase subunit 6C                                   | 0.87 | 0.044 0.380 |
| TMX4  | Q9H1E5 | Thioredoxin-related transmembrane protein 4                       | 0.75 | 0.975 0.008 |
| RU1C  | P09234 | U1 small nuclear ribonucleoprotein C                              | 0.87 | 0.002 0.967 |
| TBA4B | Q9H853 | Putative tubulin-like protein alpha-4B                            | 0.91 | 0.875 0.048 |
| ITB1  | P05556 | Integrin beta-1                                                   | 0.88 | 0.733 0.008 |
| COX7R | O14548 | Cytochrome c oxidase subunit 7A-related protein, mitochondrial    | 0.87 | 0.967 0.011 |
| ERH   | P84090 | Enhancer of rudimentary homolog                                   | 0.86 | 0.002 0.044 |
| FUS   | P35637 | RNA-binding protein FUS                                           | 0.89 | 0.002 0.776 |
| LDHB  | P07195 | L-lactate dehydrogenase B chain                                   | 0.96 | 0.017 0.002 |
| RRP1  | P56182 | Ribosomal RNA processing protein 1 homolog A                      | 0.89 | 0.987 0.011 |
| KTN1  | Q86UP2 | Kinectin                                                          | 0.92 | 0.034 0.728 |
| LMNA  | P02545 | Prelamin-A/C                                                      | 0.88 | 0.002 0.189 |

|       |        |                                                                          |      |             |
|-------|--------|--------------------------------------------------------------------------|------|-------------|
| HSPB1 | P04792 | Heat shock protein beta-1                                                | 0.8  | 0.563 0.010 |
| CNTP4 | Q9C0A0 | Contactin-associated protein-like 4                                      | 0.7  | 0.067 0.015 |
| HNRPD | Q14103 | Heterogeneous nuclear ribonucleoprotein D0                               | 0.86 | 0.003 0.109 |
| THOC4 | Q86V81 | THO complex subunit 4                                                    | 0.83 | 0.009 0.663 |
| SYT1  | P21579 | Synaptotagmin-1                                                          | 0.79 | 0.002 0.831 |
| U520  | O75643 | U5 small nuclear ribonucleoprotein 200 kDa helicase                      | 0.88 | 0.002 0.073 |
| K1C19 | P08727 | Keratin, type I cytoskeletal 19                                          | 1    | 0.002 0.002 |
| CHTOP | Q9Y3Y2 | Chromatin target of PRMT1 protein                                        | 0.83 | 0.002 0.560 |
| SDF2L | Q9HCN8 | Stromal cell-derived factor 2-like protein 1                             | 0.51 | 0.100 0.018 |
| SDHA  | P31040 | Succinate dehydrogenase [ubiquinone] flavoprotein subunit, mitochondrial | 0.89 | 0.488 0.002 |
| TIM23 | O14925 | Mitochondrial import inner membrane translocase subunit Tim23            | 0.91 | 0.683 0.017 |
| RBM22 | Q9NW64 | Pre-mRNA-splicing factor RBM22                                           | 0.82 | 0.044 0.789 |
| CCD42 | Q96M95 | Coiled-coil domain-containing protein 42                                 | 0.65 | 0.038 0.980 |
| GHITM | Q9H3K2 | Growth hormone-inducible transmembrane protein                           | 0.94 | 0.003 0.535 |
| PCOC2 | Q9UKZ9 | Procollagen C-endopeptidase enhancer 2                                   | 0.92 | 0.037 0.266 |
| PYRG1 | P17812 | CTP synthase 1                                                           | 0.9  | 0.946 0.002 |
| TBA1A | Q71U36 | Tubulin alpha-1A chain                                                   | 0.97 | 0.038 0.002 |
| RBM39 | Q14498 | RNA-binding protein 39                                                   | 0.84 | 0.002 0.286 |
| H12   | P16403 | Histone H1.2                                                             | 0.59 | 0.004 0.374 |
| DDX5  | P17844 | Probable ATP-dependent RNA helicase DDX5                                 | 0.82 | 0.002 0.002 |
| LETM1 | O95202 | LETM1 and EF-hand domain-containing protein 1, mitochondrial             | 0.88 | 0.008 0.967 |
| GRP78 | P11021 | 78 kDa glucose-regulated protein                                         | 0.97 | 0.002 0.002 |
| UTP4  | Q969X6 | U3 small nucleolar RNA-associated protein 4 homolog                      | 0.89 | 0.887 0.030 |
| RL27A | P46776 | 60S ribosomal protein L27a                                               | 0.97 | 0.081 0.002 |
| RT09  | P82933 | 28S ribosomal protein S9, mitochondrial                                  | 0.88 | 0.037 0.980 |
